# Supplementary material for: Kinetics of specific anti-SARS-CoV-2 IgM, IgA, and IgG responses during the first 12 months after SARS-CoV-2 infection: A prospective longitudinal study
Source: PLoS One. 2023 Jul 12;18(7):e0288557. doi: 10.1371/journal.pone.0288557 (PMC10337929; doi:10.1371/journal.pone.0288557)
Supplement: S1 Data — Raw data of this study including demographic data, clinical data and Immunoglobine response (IgM, IgA, IgG). These data were used to generate Table 1 and Figs 2–10. (XLSX) [file pone.0288557.s001.xlsx]

## Sheet: Table1, Figs 8-9 Raw data
ID	D00	D07	D15	D30	D60	D90	D180	D360	Sex	Age	Obesity	Diabetes	Cardiovasculaire_Disease	Asthma	Smoking	Alcohol
MOB-001	1.01	3.21	2.47	2.77	2.64	2.46	2.4	2.1	F	62	NO	YES	YES	NO	NO	NO
MOB-002	1.01	0.67	2.28	2.31	2.12	2.24	1.43	1.29	F	62	NO	YES	YES	NO	NO	NO
MOB-003	0.69	1.05	1.61	3.58	NA	NA	NA	NA	F	30	NO	NO	NO	YES	NO	NO
MOB-004	0.6	1.04	2	2.59	NA	NA	NA	NA	M	24	YES	NO	NO	NO	NO	NO
MOB-005	1.01	1.15	1.24	1.6	2.38	2.89	NA	NA	M	52	NO	NO	NO	NO	NO	NO
MOB-006	0.92	0.98	2.69	2.65	1.45	1.2	0.64	NA	M	37	NO	NO	NO	NO	YES	NO
MOY-007	0.77	0.56	2.23	1.18	2.61	2.81	1.1	0.9	F	26	NO	NO	NO	NO	NO	NO
MOY-008	0.46	1.35	1.4	3.91	1.67	1.07	NA	NA	F	24	NO	NO	NO	YES	NO	NO
MOY-009	1.49	1.46	1.74	4.1	NA	NA	NA	NA	M	18	NO	NO	NO	NO	NO	NO
MOY-010	0.53	1.76	0.74	0.66	NA	NA	NA	NA	F	58	NO	NO	NO	NO	YES	NO
MOY-011	1.99	2.6	2.9	NA	NA	NA	NA	NA	M	49	NO	YES	NO	NO	NO	NO
MOY-012	0.86	2.03	2.3	5.4	NA	NA	NA	NA	F	54	NO	NO	NO	NO	NO	NO
MOY-013	0.55	NA	NA	NA	NA	NA	NA	NA	F	69	NO	NO	NO	NO	NO	NO
MOY-014	2.14	NA	NA	NA	NA	NA	NA	NA	F	64	NO	NO	NO	NO	NO	NO
MOY-015	0.82	0.85	4.18	NA	NA	NA	NA	NA	F	34	NO	NO	NO	NO	NO	NO
MOY-016	2.25	NA	2.51	5.98	NA	2.71	3.08	2.72	M	59	NO	NO	NO	NO	NO	NO
MOY-017	0.92	1.44	1.86	5.27	NA	NA	NA	NA	F	51	NO	YES	NO	NO	NO	NO
MOY-018	0.81	2.66	3.3	6.01	2.83	NA	NA	NA	F	53	NO	YES	NO	NO	NO	NO
MOY-019	1.99	1.06	1.16	1.25	1.99	1.45	1.73	NA	M	48	NO	NO	NO	NO	YES	NO
MOY-020	0.62	NA	NA	NA	NA	NA	NA	NA	M	71	NO	YES	NO	NO	NO	NO
MOY-021	0.69	NA	NA	NA	NA	NA	NA	NA	M	41	NO	NO	NO	NO	NO	NO
MOY-022	0.64	NA	2.92	2.94	2.86	NA	NA	NA	M	60	NO	NO	NO	NO	NO	NO
MOY-023	0.55	0.44	2.31	1.81	0.94	0.85	NA	NA	M	43	NO	NO	NO	NO	YES	NO
MOY-024	0.66	2.25	2.55	3.11	2.31	2.91	1.5	1.57	M	59	NO	NO	NO	NO	NO	NO
MOY-025	1.38	3.43	2.83	3.25	3	3.35	2.08	NA	M	63	NO	NO	NO	NO	NO	NO
MOY-026	0.64	1.5	2.07	2.58	0.72	0.99	NA	NA	F	19	NO	NO	NO	NO	NO	NO
MOY-027	0.55	NA	NA	NA	NA	NA	NA	NA	F	59	NO	NO	NO	NO	NO	NO
MOY-028	0.52	2.55	1.86	2.52	NA	NA	NA	NA	F	45	NO	NO	NO	NO	NO	NO
MOY-029	0.77	0.95	2.37	3.99	1.27	NA	NA	NA	M	32	NO	NO	NO	NO	NO	NO
MOY-030	0.52	0.86	NA	5.03	1.94	NA	NA	NA	F	65	NO	NO	NO	NO	NO	NO
MOY-031	0.77	NA	NA	NA	NA	NA	NA	NA	F	36	NO	YES	NO	NO	NO	NO
MOY-032	1.11	NA	2.29	2.54	2.06	2.25	2.03	NA	F	72	NO	NO	NO	NO	NO	NO
MOY-033	0.57	2.33	1.73	2.35	2.09	1.64	NA	NA	F	35	NO	NO	NO	NO	NO	NO
MOY-034	0.4	NA	NA	NA	NA	NA	NA	NA	M	32	NO	NO	NO	NO	NO	NO
MOB-035	0.77	0.88	0.52	0.96	0.6	0.79	0.98	2.72	F	47	NO	NO	NO	YES	NO	NO
MOB-036	1.72	NA	NA	NA	NA	NA	NA	NA	M	47	NO	NO	NO	NO	NO	NO
MOB-037	0.74	2.94	NA	NA	NA	NA	NA	NA	F	42	NO	NO	NO	NO	NO	NO
MOB-038	0.48	0.59	NA	2.13	1.2	NA	NA	NA	F	52	NO	NO	NO	NO	NO	NO
MOB-039	0.82	2.08	NA	2.57	1.34	2.17	1.45	NA	M	53	NO	NO	NO	NO	NO	NO
MOY-040	0.45	0.51	0.97	0.91	NA	NA	NA	NA	M	61	NO	NO	NO	NO	YES	NO
MOY-041	2.07	2.49	NA	NA	NA	NA	NA	NA	F	60	NO	NO	NO	NO	NO	NO
MOY-042	0.98	3.18	2.58	2.41	2.14	NA	NA	NA	F	59	NO	NO	NO	NO	NO	NO
MOY-043	0.68	2.66	NA	2.71	1.35	NA	0.67	NA	M	50	NO	NO	NO	NO	NO	NO
MOY-044	0.56	NA	NA	NA	NA	NA	NA	NA	F	41	NO	NO	NO	NO	NO	NO
MOY-045	0.59	3.15	2.06	2.69	1.71	2.26	NA	NA	F	24	NO	NO	NO	NO	NO	NO
MOY-046	0.42	NA	NA	NA	NA	NA	NA	NA	M	48	NO	NO	NO	NO	NO	NO
MOY-047	0.75	NA	2.36	2.77	1.27	NA	NA	NA	F	25	NO	NO	NO	NO	NO	NO
MOY-048	1.88	2.85	NA	NA	NA	NA	NA	NA	M	52	NO	NO	NO	NO	NO	NO
MOB-049	1.03	1.76	1.8	2.17	2.06	1.71	1	0.83	M	67	NO	NO	YES	NO	NO	NO
MOB-050	0.9	2.15	1.93	2.26	3.1	1.42	NA	NA	F	63	NO	NO	NO	NO	NO	NO
MOY-051	1.08	1.97	NA	NA	NA	NA	NA	NA	F	43	NO	NO	NO	NO	NO	NO
MOY-052	0.41	1.6	NA	NA	NA	NA	NA	NA	F	48	NO	NO	NO	YES	NO	NO
MOY-053	1.2	2.93	NA	NA	NA	NA	NA	NA	F	74	NO	YES	NO	NO	NO	NO
MOY-054	0.81	1.12	NA	NA	NA	NA	NA	NA	M	81	NO	NO	NO	NO	NO	NO
MOY-055	0.36	NA	NA	NA	NA	NA	NA	NA	F	31	NO	NO	NO	NO	NO	NO
MOY-056	0.98	2.14	1.73	1.91	0.84	1.06	NA	NA	F	24	NO	NO	NO	NO	YES	NO
MOY-057	0.51	1.78	2.38	3.24	NA	NA	NA	NA	M	56	NO	NO	NO	NO	NO	NO
MOY-058	1.7	NA	NA	2.76	1.38	2.69	NA	NA	F	58	NO	YES	NO	NO	NO	NO
MOY-059	0.78	NA	2.16	3.28	3.05	2.56	NA	NA	F	53	NO	NO	NO	NO	NO	NO
MOY-060	0.45	NA	NA	NA	NA	NA	NA	NA	F	53	NO	NO	NO	NO	NO	NO
MOY-061	0.52	NA	NA	NA	NA	NA	NA	NA	M	24	NO	NO	NO	NO	NO	NO
MOY-062	0.32	1.64	1.65	2.08	0.79	NA	NA	NA	M	32	NO	NO	NO	NO	YES	NO
MOB-063	0.73	1.83	1.72	2.01	1.04	0.73	NA	NA	M	26	NO	NO	NO	NO	NO	NO
MOB-064	0.48	2.56	4.72	2.05	1.73	1.12	1.6	NA	F	59	NO	NO	NO	NO	NO	NO
MOB-065	0.43	2.03	3.66	1.88	NA	NA	NA	NA	M	25	NO	NO	NO	NO	NO	NO
MOY-066	NA	1.2	NA	NA	NA	NA	NA	NA	F	25	NO	NO	NO	NO	NO	NO
MOY-067	0.45	0.72	1.18	2.89	1.29	1.76	1.14	1.68	F	56	NO	NO	NO	YES	NO	NO
MOY-068	0.99	NA	NA	NA	NA	NA	NA	NA	F	74	YES	YES	NO	NO	NO	NO
MOY-069	1.3	0.78	2.17	NA	NA	NA	NA	NA	F	56	NO	NO	NO	NO	NO	NO
MOY-070	1.08	2.51	2.87	3.1	NA	NA	NA	NA	F	57	NO	NO	NO	NO	NO	NO
MOY-071	0.59	NA	NA	3.15	1.87	2.58	NA	NA	M	50	NO	NO	NO	NO	NO	NO
MOY-072	0.43	0.71	0.65	2.85	NA	NA	NA	NA	M	49	NO	NO	NO	NO	YES	YES
MOY-073	0.51	0.88	1.88	2.79	NA	NA	NA	NA	M	57	NO	NO	NO	NO	NO	NO
MOY-074	1.26	3.06	2.86	3.5	NA	NA	NA	NA	F	57	NO	NO	NO	NO	NO	NO
MOY-075	1.21	2.43	2.12	3.2	1.64	2.67	2.44	NA	F	55	NO	YES	NO	NO	NO	NO
MOB-076	2.72	2.9	2.41	2.71	2.79	2.1	1.74	NA	M	60	NO	NO	NO	NO	NO	NO
MOB-077	1.13	1.22	2.42	2.03	1	0.78	NA	NA	M	19	NO	NO	NO	NO	NO	NO
MOB-078	1.01	1.45	3.42	2.71	1.05	0.83	NA	NA	F	24	NO	NO	NO	NO	NO	NO
MOB-079	1.54	2.18	1.71	2.3	NA	NA	NA	NA	F	56	NO	YES	NO	NO	NO	NO
MOB-080	0.52	2.84	2.79	NA	NA	NA	NA	NA	F	55	NO	YES	NO	NO	NO	NO
MOY-081	0.36	2.62	4.43	2.95	NA	1.91	NA	NA	M	29	NO	NO	NO	NO	YES	NO
MOY-082	2.57	3.54	2.79	3.61	2.14	1.51	NA	NA	M	70	NO	NO	NO	NO	NO	NO
MOY-083	1.43	3.16	2.52	3.54	NA	NA	NA	NA	M	47	NO	NO	NO	NO	NO	NO
MOY-084	0.49	NA	NA	NA	NA	NA	NA	NA	F	63	NO	NO	NO	NO	NO	NO
MOY-086	0.91	1.32	2.54	3.21	1.68	1.79	NA	NA	F	35	NO	NO	NO	NO	NO	NO
MOY-087	0.96	NA	NA	NA	NA	NA	NA	NA	F	49	NO	YES	NO	NO	NO	NO
MOY-088	1.33	NA	NA	NA	NA	NA	NA	NA	M	60	NO	NO	NO	NO	NO	NO
MOB-089	2.07	3.05	2.77	3.61	NA	NA	NA	NA	F	52	NO	NO	NO	NO	NO	NO
MOY-090	1.01	NA	NA	NA	NA	NA	NA	NA	F	22	NO	NO	NO	NO	NO	NO
MOY-091	0.55	NA	NA	NA	NA	NA	NA	NA	F	30	NO	NO	NO	NO	NO	NO
MOY-092	0.89	NA	NA	NA	NA	NA	NA	NA	F	30	NO	NO	NO	YES	NO	NO
MOY-093	1.61	NA	NA	NA	NA	NA	NA	NA	F	48	NO	NO	NO	NO	NO	NO
MOY-094	1.1	3.33	5.53	3.48	NA	NA	NA	NA	F	19	NO	NO	NO	NO	NO	NO
MOY-095	0.76	0.95	2.62	3.19	NA	NA	NA	NA	F	48	NO	NO	NO	NO	NO	NO
MOY-096	0.67	NA	NA	NA	NA	NA	NA	NA	M	46	NO	NO	NO	NO	NO	NO
MOY-097	0.49	NA	NA	NA	NA	NA	NA	NA	M	46	NO	NO	NO	YES	NO	NO
MOY-098	0.62	0.77	2.56	2.96	1.97	NA	NA	NA	F	58	NO	NO	NO	NO	NO	NO
MOY-099	1.33	3.2	3.41	3.14	3.19	2.36	2.47	NA	M	65	NO	NO	YES	NO	NO	NO
MOY-100	0.43	NA	2.45	3.05	NA	2.25	1.56	NA	F	42	NO	NO	NO	NO	NO	NO
MOY-101	0.52	NA	NA	NA	NA	NA	NA	NA	F	49	NO	NO	NO	NO	NO	NO
MOB-102	0.5	NA	1.61	0.71	0.68	NA	NA	NA	F	44	NO	NO	NO	NO	NO	NO
MOB-103	0.38	NA	NA	NA	NA	NA	NA	NA	F	59	NO	NO	NO	NO	NO	NO
MOB-104	0.71	NA	NA	NA	NA	NA	NA	NA	F	25	NO	NO	NO	NO	NO	NO
MOB-105	1.49	NA	NA	NA	NA	NA	NA	NA	M	61	NO	NO	NO	NO	NO	NO
MOB-106	0.74	NA	NA	NA	NA	NA	NA	NA	F	25	NO	NO	NO	NO	NO	NO
MOY-107	1.03	1.13	2.22	2.87	1.35	1.25	1.25	NA	F	25	NO	NO	NO	NO	NO	NO
MOY-108	0.37	0.56	1.17	1.76	0.74	0.71	NA	NA	M	19	NO	NO	NO	NO	NO	NO
MOY-109	0.43	1.97	2.02	3.07	2.26	NA	NA	NA	F	30	NO	NO	NO	NO	NO	NO
MOY-110	0.76	0.72	1.19	1.29	1.33	1.03	0.76	0.53	M	53	NO	YES	NO	NO	NO	NO
MOB-111	1.15	NA	NA	NA	NA	NA	NA	NA	F	41	NO	NO	NO	NO	NO	NO
MOB-112	0.88	1.26	NA	NA	NA	NA	NA	NA	F	27	NO	NO	NO	NO	NO	NO
MOY-113	1	2.08	2.13	2.55	2.78	NA	1.55	NA	F	68	NO	NO	NO	YES	NO	NO
MOY-114	0.73	4.45	3.09	3.14	NA	NA	NA	NA	F	47	NO	NO	NO	NO	NO	NO
MOY-115	1.06	1.15	0.89	2.41	1.21	NA	NA	NA	F	19	NO	NO	NO	NO	NO	NO
MOY-116	0.56	2.16	2.88	NA	NA	NA	NA	NA	F	58	NO	NO	NO	NO	NO	NO
MOB-117	0.46	1.18	0.84	NA	NA	NA	NA	NA	M	24	NO	NO	NO	NO	NO	NO
MOY-118	0.4	1.08	1.56	1.55	0.69	NA	NA	NA	F	45	NO	NO	NO	NO	YES	NO
MOB-119	0.29	2.65	NA	3.13	2.15	NA	NA	NA	F	36	NO	NO	NO	NO	NO	NO
MOB-120	0.92	2.17	NA	NA	NA	NA	NA	NA	F	42	NO	NO	NO	NO	NO	NO
MOY-121	0.38	NA	NA	NA	NA	NA	NA	NA	M	50	NO	NO	NO	NO	NO	NO
MOY-122	0.57	NA	NA	NA	NA	NA	NA	NA	F	65	NO	NO	NO	NO	YES	NO
MOY-123	0.43	NA	NA	NA	NA	NA	NA	NA	F	19	NO	NO	NO	NO	NO	NO
MOY-124	0.49	2.23	2.42	2.94	1.13	NA	NA	NA	M	67	NO	NO	NO	NO	NO	NO
MOY-125	0.74	1.52	1.59	2.29	1.18	NA	NA	NA	F	27	NO	NO	NO	NO	NO	NO
MOY-126	0.46	2.05	2.89	2.74	1.93	2.23	NA	NA	M	37	NO	NO	NO	NO	NO	NO
MOB-127	0.77	2.25	3.14	3.34	NA	NA	NA	NA	M	54	NO	NO	NO	NO	NO	NO
MOB-128	0.99	NA	NA	NA	NA	NA	NA	NA	F	49	NO	NO	NO	NO	NO	NO
MOY-129	1.88	2.98	5.4	3.07	1.31	2.04	NA	NA	F	19	NO	NO	NO	NO	NO	NO
MOY-130	1.06	NA	2.47	2.42	1.33	1.8	0.99	0.87	F	54	NO	NO	NO	NO	NO	NO
MOY-131	0.58	0.74	1.05	1.18	0.95	NA	NA	NA	M	41	NO	NO	NO	NO	YES	NO
MOY-132	0.61	NA	NA	NA	NA	NA	NA	NA	M	30	NO	NO	NO	NO	NO	NO
MOY-133	0.64	NA	NA	NA	NA	NA	NA	NA	M	53	NO	NO	NO	NO	NO	NO
MOY-134	0.54	2.44	4.19	2.83	NA	NA	NA	NA	M	55	NO	YES	NO	NO	NO	NO
MOY-135	0.61	0.71	0.6	1.15	1.23	0.61	NA	NA	F	18	NO	NO	NO	NO	NO	NO
MOY-136	0.49	0.76	NA	1.28	NA	NA	NA	NA	M	27	NO	NO	NO	NO	YES	NO
MOY-137	0.42	2.49	NA	NA	NA	NA	NA	NA	F	54	NO	YES	NO	NO	NO	NO
MOY-138	0.97	1.13	NA	2.5	NA	NA	NA	NA	M	44	NO	NO	NO	NO	YES	NO
MOY-139	0.42	0.72	1.5	2.03	2.3	1.09	0.61	0.52	M	46	NO	NO	NO	NO	NO	YES
MOY-140	0.77	2.96	2.11	2.36	2.88	1.09	0.93	0.69	F	20	NO	NO	NO	NO	NO	NO
MOY-141	0.52	1.14	0.93	1.7	2.22	1.02	NA	NA	F	29	NO	NO	NO	NO	NO	NO
MOY-142	0.46	0.63	NA	0.7	NA	NA	NA	NA	M	28	NO	NO	NO	NO	YES	NO
MOY-143	1.34	2.66	2.94	NA	NA	NA	NA	NA	M	56	NO	NO	NO	NO	YES	YES
MOY-144	0.38	NA	NA	NA	NA	NA	NA	NA	M	59	NO	YES	NO	NO	NO	NO
MOY-145	0.79	0.94	1.66	1.21	1.44	0.49	NA	NA	M	32	NO	NO	NO	NO	YES	NO
MOY-146	0.48	2.31	2.55	2.24	2.84	1.6	1.9	1.01	F	26	NO	NO	NO	NO	NO	NO
MOY-147	0.52	2.04	1.27	NA	NA	NA	NA	NA	F	32	NO	NO	NO	NO	NO	NO
MOY-148	0.82	NA	NA	NA	NA	NA	NA	NA	F	27	NO	NO	NO	NO	NO	NO
MOY-149	0.45	NA	2.87	NA	NA	NA	NA	NA	M	52	NO	NO	NO	NO	NO	NO
MOY-150	0.64	3.1	5.18	2.81	NA	NA	NA	NA	F	56	NO	NO	NO	NO	NO	NO
MOY-151	0.54	3.07	NA	2.09	NA	NA	NA	NA	F	42	NO	NO	NO	NO	NO	NO
MOY-152	0.83	2.17	3.2	0.56	2.23	1.11	NA	NA	F	25	NO	NO	NO	NO	NO	NO
MOY-153	0.51	NA	NA	NA	NA	NA	NA	NA	F	22	NO	NO	NO	NO	NO	NO
MOY-154	0.76	1.24	1.12	1.71	1.57	0.86	NA	NA	M	35	NO	NO	NO	NO	NO	NO
MOY-155	0.69	2.12	1.73	2.24	1.89	1.37	0.98	0.73	M	56	NO	NO	NO	NO	NO	YES
MOY-156	0.99	1.08	0.61	1.56	1.21	0.85	0.73	0.64	M	60	NO	NO	NO	NO	NO	NO
MOY-157	0.55	0.53	NA	NA	NA	NA	NA	NA	F	18	NO	NO	NO	NO	NO	NO
MOY-158	0.43	1.37	NA	NA	NA	NA	NA	NA	F	67	NO	NO	NO	NO	NO	NO
MOY-159	0.35	1.93	1.89	2.05	2.55	1.02	0.72	0.82	F	29	NO	NO	NO	NO	NO	NO
MOY-160	0.5	3.49	2.49	2.19	NA	NA	NA	NA	F	48	NO	NO	NO	NO	NO	NO
MOY-161	0.97	0.7	1.65	2.26	2.48	NA	NA	NA	F	67	NO	YES	NO	NO	NO	NO
MOB-162	0.36	NA	NA	NA	NA	NA	NA	NA	F	35	NO	NO	NO	NO	NO	NO
MOB-163	1.23	NA	NA	NA	NA	NA	NA	NA	M	26	NO	NO	NO	NO	NO	NO
MOB-164	0.4	NA	NA	NA	NA	NA	NA	NA	F	39	NO	NO	NO	NO	NO	NO
MOB-165	0.96	NA	NA	NA	NA	NA	NA	NA	F	32	NO	NO	NO	NO	NO	NO
MOB-166	0.89	1.8	1.42	1.21	1.22	0.84	0.59	0.54	M	40	NO	NO	NO	NO	YES	NO
MOY-168	0.47	2.18	NA	NA	NA	NA	NA	NA	F	27	NO	NO	NO	NO	NO	NO
MOY-169	0.63	3.52	3.11	2.62	2.94	2.35	NA	NA	M	24	NO	NO	NO	NO	NO	NO
MOY-170	0.93	1.2	2.42	1.06	NA	NA	NA	NA	F	28	NO	NO	NO	NO	NO	NO
MOY-171	0.49	1.15	3.72	1.71	NA	NA	NA	NA	F	27	NO	NO	NO	NO	NO	NO
MOY-172	1.52	1.48	2.82	2	2.31	NA	NA	NA	F	25	NO	NO	NO	NO	NO	NO
MOY-173	0.57	0.85	2.77	2.4	3.48	3.45	NA	NA	F	67	NO	NO	NO	NO	NO	NO
MOY-174	1.25	1.71	0.82	1.25	1.1	1.55	0.75	1.06	M	87	NO	NO	NO	NO	NO	NO
MOY-175	0.58	2.22	NA	1.89	NA	NA	NA	NA	F	50	NO	NO	NO	NO	NO	NO
MOY-176	0.86	1.1	0.86	1.36	NA	NA	NA	NA	F	81	NO	NO	NO	NO	NO	NO
MOY-177	0.74	2.64	2.61	2.45	2.73	2.1	1.76	1.06	M	62	NO	YES	NO	NO	NO	NO
MOY-178	0.42	2.33	2.63	2.4	NA	NA	NA	NA	F	53	NO	NO	NO	NO	NO	NO
MOY-179	0.48	0.82	2.87	2.69	NA	NA	NA	NA	M	30	NO	NO	NO	NO	NO	NO
MOY-180	0.62	NA	NA	NA	NA	NA	NA	NA	F	68	NO	NO	NO	NO	NO	NO
MOY-181	0.41	0.97	2.31	2.53	2.7	NA	NA	NA	F	52	YES	YES	NO	NO	NO	NO
MOY-182	0.39	3.44	1.55	1.59	NA	NA	NA	NA	M	36	NO	NO	NO	NO	NO	NO
MOY-183	0.51	4.08	2.9	2.93	NA	2.64	2.84	NA	M	22	NO	NO	NO	NO	NO	NO
MOY-184	0.72	0.93	1.36	1.37	NA	NA	NA	NA	F	77	YES	NO	YES	NO	NO	NO
MOY-185	1.15	3.87	3.26	3.1	3.51	2.44	2.14	1.24	F	57	NO	NO	NO	NO	NO	NO
MOY-186	3.57	3.7	3.34	3.03	NA	2.7	2.46	NA	F	77	NO	YES	NO	NO	NO	NO
MOY-187	0.93	2.87	2.89	NA	NA	NA	NA	NA	F	65	NO	NO	NO	NO	NO	NO
MOY-188	0.65	1.16	NA	NA	NA	NA	NA	NA	F	33	NO	NO	NO	NO	NO	NO
MOY-189	0.59	NA	1.12	0.69	NA	NA	NA	NA	M	23	NO	NO	NO	NO	NO	NO
MOY-190	0.56	NA	3.11	2.55	NA	NA	NA	NA	M	33	NO	NO	NO	NO	NO	NO
MOY-085	0.37	0.9	3.44	1.66	0.68	0.64	0.72	2.19	M	33	NO	NO	NO	NO	YES	NO
MOB-167	2.35	1.84	0.83	1.44	1.9	1.61	1.61	1.5	F	79	NO	NO	NO	NO	NO	NO

## Sheet: Figs 6-7 Raw data
ID	D00	D07	D15	D30	D60	D90	D180	D360	Sex	Age	Obesity	Diabetes	Cardiovasculaire_Disease	Asthma	Smoking	Alcohol
MOB-001	NA	NA	NA	NA	NA	NA	NA	NA	F	62	NO	YES	YES	NO	NO	NO
MOB-002	NA	NA	NA	NA	NA	NA	NA	NA	F	62	NO	YES	YES	NO	NO	NO
MOB-003	149.7	316.8	448.7	454.9	NA	NA	NA	NA	F	30	NO	NO	NO	YES	NO	NO
MOB-004	4.9	308.9	1054.2	716.9	378.2	224.1	NA	NA	M	24	YES	NO	NO	NO	NO	NO
MOB-005	4.9	24.5	174	484.7	NA	NA	NA	NA	M	52	NO	NO	NO	NO	NO	NO
MOB-006	7.7	84.7	326.9	195.8	171.3	147.7	64.5	NA	M	37	NO	NO	NO	NO	YES	NO
MOY-007	5.1	20.3	513.8	713.7	597.3	447.8	355.6	281.3	F	26	NO	NO	NO	NO	NO	NO
MOY-008	3.8	51.3	227.8	413.7	639.9	277.4	NA	NA	F	24	NO	NO	NO	YES	NO	NO
MOY-009	7.9	134.3	767.4	1177.6	NA	NA	NA	NA	M	18	NO	NO	NO	NO	NO	NO
MOY-010	3.4	214.3	3.1	5.4	NA	NA	NA	NA	F	58	NO	NO	NO	NO	YES	NO
MOY-011	322.8	8389.8	6065.9	NA	NA	NA	NA	NA	M	49	NO	YES	NO	NO	NO	NO
MOY-012	8.1	184.7	392.4	557	NA	NA	NA	NA	F	54	NO	NO	NO	NO	NO	NO
MOY-013	126.5	NA	NA	NA	NA	NA	NA	NA	F	69	NO	NO	NO	NO	NO	NO
MOY-014	12.8	NA	NA	NA	NA	NA	NA	NA	F	64	NO	NO	NO	NO	NO	NO
MOY-015	2.7	91.8	117	NA	NA	NA	NA	NA	F	34	NO	NO	NO	NO	NO	NO
MOY-016	2447.8	NA	20906.8	21593.7	NA	5029.2	2844.5	1910.7	M	59	NO	NO	NO	NO	NO	NO
MOY-017	15.8	201.2	264.4	605.8	NA	NA	NA	NA	F	51	NO	YES	NO	NO	NO	NO
MOY-018	125.4	229.1	531.5	355.4	242.3	NA	NA	NA	F	53	NO	YES	NO	NO	NO	NO
MOY-019	3.5	96	222.7	429	NA	NA	NA	NA	M	48	NO	NO	NO	NO	YES	NO
MOY-020	7.3	NA	NA	NA	NA	NA	NA	NA	M	71	NO	YES	NO	NO	NO	NO
MOY-021	4	NA	NA	NA	NA	NA	NA	NA	M	41	NO	NO	NO	NO	NO	NO
MOY-022	7.7	NA	3015.5	1576.8	612.9	NA	NA	NA	M	60	NO	NO	NO	NO	NO	NO
MOY-023	1.3	124	129.4	179.5	177.7	132.2	NA	NA	M	43	NO	NO	NO	NO	YES	NO
MOY-024	9.9	345.4	2101.2	3922.4	NA	NA	NA	NA	M	59	NO	NO	NO	NO	NO	NO
MOY-025	NA	NA	NA	NA	NA	NA	NA	NA	M	63	NO	NO	NO	NO	NO	NO
MOY-026	5.2	275	153	156.7	214.7	134.6	NA	NA	F	19	NO	NO	NO	NO	NO	NO
MOY-027	4.8	NA	NA	NA	NA	NA	NA	NA	F	59	NO	NO	NO	NO	NO	NO
MOY-028	4.5	505.5	1827	2153.9	NA	NA	NA	NA	F	45	NO	NO	NO	NO	NO	NO
MOY-029	6.6	9.6	104.9	133	96.3	NA	NA	NA	M	32	NO	NO	NO	NO	NO	NO
MOY-030	110.6	32064.2	NA	17169.1	9203.6	NA	NA	NA	F	65	NO	NO	NO	NO	NO	NO
MOY-031	9.4	NA	NA	NA	NA	NA	NA	NA	F	36	NO	YES	NO	NO	NO	NO
MOY-032	NA	NA	NA	NA	NA	NA	NA	NA	F	72	NO	NO	NO	NO	NO	NO
MOY-033	28.2	111.7	102.5	118.7	91.2	87.9	NA	NA	F	35	NO	NO	NO	NO	NO	NO
MOY-034	4.9	NA	NA	NA	NA	NA	NA	NA	M	32	NO	NO	NO	NO	NO	NO
MOB-035	3821.7	1985.2	1181.1	680.9	NA	NA	NA	NA	F	47	NO	NO	NO	YES	NO	NO
MOB-036	4.6	NA	NA	NA	NA	NA	NA	NA	M	47	NO	NO	NO	NO	NO	NO
MOB-037	2.3	220.4	NA	NA	NA	NA	NA	NA	F	42	NO	NO	NO	NO	NO	NO
MOB-038	16.9	109.5	NA	505.5	335.2	NA	NA	NA	F	52	NO	NO	NO	NO	NO	NO
MOB-039	10.2	391.3	NA	NA	NA	NA	NA	NA	M	53	NO	NO	NO	NO	NO	NO
MOY-040	11.5	302.5	398.3	304.3	NA	NA	NA	NA	M	61	NO	NO	NO	NO	YES	NO
MOY-041	1589.1	226.2	NA	NA	NA	NA	NA	NA	F	60	NO	NO	NO	NO	NO	NO
MOY-042	32.5	2736.5	3853.2	3193.7	2292.5	NA	NA	NA	F	59	NO	NO	NO	NO	NO	NO
MOY-043	45.1	316.1	NA	384.6	274.2	NA	139.3	NA	M	50	NO	NO	NO	NO	NO	NO
MOY-044	12.7	NA	NA	NA	NA	NA	NA	NA	F	41	NO	NO	NO	NO	NO	NO
MOY-045	2.3	2299.6	548	377.8	371	298.2	NA	NA	F	24	NO	NO	NO	NO	NO	NO
MOY-046	2	NA	NA	NA	NA	NA	NA	NA	M	48	NO	NO	NO	NO	NO	NO
MOY-047	7.5	NA	918.1	682.9	421.8	NA	NA	NA	F	25	NO	NO	NO	NO	NO	NO
MOY-048	4436.4	10958.1	NA	NA	NA	NA	NA	NA	M	52	NO	NO	NO	NO	NO	NO
MOB-049	NA	NA	NA	NA	NA	NA	NA	NA	M	67	NO	NO	YES	NO	NO	NO
MOB-050	NA	NA	NA	NA	NA	NA	NA	NA	F	63	NO	NO	NO	NO	NO	NO
MOY-051	10.6	149.8	NA	NA	NA	NA	NA	NA	F	43	NO	NO	NO	NO	NO	NO
MOY-052	5.3	1100.1	NA	NA	NA	NA	NA	NA	F	48	NO	NO	NO	YES	NO	NO
MOY-053	2520.7	8577.9	NA	NA	NA	NA	NA	NA	F	74	NO	YES	NO	NO	NO	NO
MOY-054	1659.7	7482	NA	NA	NA	NA	NA	NA	M	81	NO	NO	NO	NO	NO	NO
MOY-055	852.4	NA	NA	NA	NA	NA	NA	NA	F	31	NO	NO	NO	NO	NO	NO
MOY-056	71.9	174.4	192.3	152.9	101.1	72.5	NA	NA	F	24	NO	NO	NO	NO	YES	NO
MOY-057	12.9	1036.4	2053	3101.4	NA	NA	NA	NA	M	56	NO	NO	NO	NO	NO	NO
MOY-058	6.9	NA	NA	792.7	684.7	356.8	NA	NA	F	58	NO	YES	NO	NO	NO	NO
MOY-059	27.5	NA	18335.4	22426.6	14953.4	8086	NA	NA	F	53	NO	NO	NO	NO	NO	NO
MOY-060	7.3	NA	NA	NA	NA	NA	NA	NA	F	53	NO	NO	NO	NO	NO	NO
MOY-061	3.3	NA	NA	NA	NA	NA	NA	NA	M	24	NO	NO	NO	NO	NO	NO
MOY-062	34.7	297.2	242.4	468.8	335.6	NA	NA	NA	M	32	NO	NO	NO	NO	YES	NO
MOB-063	110.5	422.2	235.8	312.1	321.9	301.2	NA	NA	M	26	NO	NO	NO	NO	NO	NO
MOB-064	4.8	50.3	96.1	213.6	468.3	1225.7	NA	NA	F	59	NO	NO	NO	NO	NO	NO
MOB-065	9	277.3	338.4	240.5	NA	NA	NA	NA	M	25	NO	NO	NO	NO	NO	NO
MOY-066	NA	19.4	NA	NA	NA	NA	NA	NA	F	25	NO	NO	NO	NO	NO	NO
MOY-067	5.5	33.6	74.3	161.7	NA	NA	NA	NA	F	56	NO	NO	NO	YES	NO	NO
MOY-068	1453.1	NA	NA	NA	NA	NA	NA	NA	F	74	YES	YES	NO	NO	NO	NO
MOY-069	7.9	22.6	1280.7	NA	NA	NA	NA	NA	F	56	NO	NO	NO	NO	NO	NO
MOY-070	7	43.3	270.5	454.4	NA	NA	NA	NA	F	57	NO	NO	NO	NO	NO	NO
MOY-071	3.9	NA	NA	3553.6	2293.8	1588.5	NA	NA	M	50	NO	NO	NO	NO	NO	NO
MOY-072	11.6	41.9	589.7	772.7	NA	NA	NA	NA	M	49	NO	NO	NO	NO	YES	YES
MOY-073	2.7	14.2	498.9	1271	NA	NA	NA	NA	M	57	NO	NO	NO	NO	NO	NO
MOY-074	11.6	12981.8	20484.8	12581.6	NA	NA	NA	NA	F	57	NO	NO	NO	NO	NO	NO
MOY-075	15.6	7507.2	1431.8	1440.3	NA	NA	NA	NA	F	55	NO	YES	NO	NO	NO	NO
MOB-076	NA	NA	NA	NA	NA	NA	NA	NA	M	60	NO	NO	NO	NO	NO	NO
MOB-077	70.4	104.8	139	131.4	110.5	103.6	NA	NA	M	19	NO	NO	NO	NO	NO	NO
MOB-078	128.1	133.4	150.6	167.9	107.3	103.7	NA	NA	F	24	NO	NO	NO	NO	NO	NO
MOB-079	213.1	352.3	367.1	277.6	NA	NA	NA	NA	F	56	NO	YES	NO	NO	NO	NO
MOB-080	15.7	5089.1	5440.2	NA	NA	NA	NA	NA	F	55	NO	YES	NO	NO	NO	NO
MOY-081	3.1	259.9	477.2	535.5	NA	356.7	NA	NA	M	29	NO	NO	NO	NO	YES	NO
MOY-082	125.1	294.9	540.5	618.1	428.8	295.3	NA	NA	M	70	NO	NO	NO	NO	NO	NO
MOY-083	40.6	153.7	251.4	333.6	NA	NA	NA	NA	M	47	NO	NO	NO	NO	NO	NO
MOY-084	15.5	NA	NA	NA	NA	NA	NA	NA	F	63	NO	NO	NO	NO	NO	NO
MOY-085	1.2	41	360.8	94.9	117.6	120.1	64.6	78.8	M	33	NO	NO	NO	NO	YES	NO
MOY-086	3	25.8	349.9	554.2	456.2	271.8	NA	NA	F	35	NO	NO	NO	NO	NO	NO
MOY-087	256.1	NA	NA	NA	NA	NA	NA	NA	F	49	NO	YES	NO	NO	NO	NO
MOY-088	91.9	NA	NA	NA	NA	NA	NA	NA	M	60	NO	NO	NO	NO	NO	NO
MOB-089	768.5	4612.8	5486.4	4526.3	NA	NA	NA	NA	F	52	NO	NO	NO	NO	NO	NO
MOY-090	10.3	NA	NA	NA	NA	NA	NA	NA	F	22	NO	NO	NO	NO	NO	NO
MOY-091	7.3	NA	NA	NA	NA	NA	NA	NA	F	30	NO	NO	NO	NO	NO	NO
MOY-092	5.9	NA	NA	NA	NA	NA	NA	NA	F	30	NO	NO	NO	YES	NO	NO
MOY-093	150.7	NA	NA	NA	NA	NA	NA	NA	F	48	NO	NO	NO	NO	NO	NO
MOY-094	12	1299	1676	2001.7	NA	NA	NA	NA	F	19	NO	NO	NO	NO	NO	NO
MOY-095	NA	NA	NA	NA	NA	NA	NA	NA	F	48	NO	NO	NO	NO	NO	NO
MOY-096	10.3	NA	NA	NA	NA	NA	NA	NA	M	46	NO	NO	NO	NO	NO	NO
MOY-097	3.1	NA	NA	NA	NA	NA	NA	NA	M	46	NO	NO	NO	YES	NO	NO
MOY-098	5.5	13.2	1321.4	NA	NA	NA	NA	NA	F	58	NO	NO	NO	NO	NO	NO
MOY-099	NA	NA	NA	NA	NA	NA	NA	NA	M	65	NO	NO	YES	NO	NO	NO
MOY-100	6.8	NA	558.4	3155.5	NA	762.7	NA	NA	F	42	NO	NO	NO	NO	NO	NO
MOY-101	9.5	NA	NA	NA	NA	NA	NA	NA	F	49	NO	NO	NO	NO	NO	NO
MOB-102	13.8	NA	149.4	136.6	241.5	NA	NA	NA	F	44	NO	NO	NO	NO	NO	NO
MOB-103	3.1	NA	NA	NA	NA	NA	NA	NA	F	59	NO	NO	NO	NO	NO	NO
MOB-104	10.8	NA	NA	NA	NA	NA	NA	NA	F	25	NO	NO	NO	NO	NO	NO
MOB-105	5.8	NA	NA	NA	NA	NA	NA	NA	M	61	NO	NO	NO	NO	NO	NO
MOB-106	96.7	NA	NA	NA	NA	NA	NA	NA	F	25	NO	NO	NO	NO	NO	NO
MOY-107	8.3	12.2	429.4	611.9	387	450	638.6	NA	F	25	NO	NO	NO	NO	NO	NO
MOY-108	5.5	10.3	100	139.8	99.1	67.5	NA	NA	M	19	NO	NO	NO	NO	NO	NO
MOY-109	5.3	70.2	373.1	577.9	252.4	NA	NA	NA	F	30	NO	NO	NO	NO	NO	NO
MOY-110	NA	NA	NA	NA	NA	NA	NA	NA	M	53	NO	YES	NO	NO	NO	NO
MOB-111	26	NA	NA	NA	NA	NA	NA	NA	F	41	NO	NO	NO	NO	NO	NO
MOB-112	10	70.6	NA	NA	NA	NA	NA	NA	F	27	NO	NO	NO	NO	NO	NO
MOY-113	NA	NA	NA	NA	NA	NA	NA	NA	F	68	NO	NO	NO	YES	NO	NO
MOY-114	52.7	2161.1	3288.5	3915.3	NA	NA	NA	NA	F	47	NO	NO	NO	NO	NO	NO
MOY-115	5.6	24	183.8	321.4	271.7	NA	NA	NA	F	19	NO	NO	NO	NO	NO	NO
MOY-116	8.7	30.7	801.9	NA	NA	NA	NA	NA	F	58	NO	NO	NO	NO	NO	NO
MOB-117	6.8	90.9	89.3	NA	NA	NA	NA	NA	M	24	NO	NO	NO	NO	NO	NO
MOY-118	10.6	133.3	170.9	332.4	330.8	NA	NA	NA	F	45	NO	NO	NO	NO	YES	NO
MOB-119	4.1	738.1	NA	3518.6	2499.9	NA	NA	NA	F	36	NO	NO	NO	NO	NO	NO
MOB-120	4.5	220.8	NA	NA	NA	NA	NA	NA	F	42	NO	NO	NO	NO	NO	NO
MOY-121	11.9	NA	NA	NA	NA	NA	NA	NA	M	50	NO	NO	NO	NO	NO	NO
MOY-122	525.6	NA	NA	NA	NA	NA	NA	NA	F	65	NO	NO	NO	NO	YES	NO
MOY-123	5.8	NA	NA	NA	NA	NA	NA	NA	F	19	NO	NO	NO	NO	NO	NO
MOY-124	17.3	408	948.9	624.5	1107.4	NA	NA	NA	M	67	NO	NO	NO	NO	NO	NO
MOY-125	6.2	84.8	159.4	316.7	397	NA	NA	NA	F	27	NO	NO	NO	NO	NO	NO
MOY-126	3.9	126	7950.5	7768.2	3402.2	1876.4	NA	NA	M	37	NO	NO	NO	NO	NO	NO
MOB-127	4	135.6	2809.6	3050.5	NA	NA	NA	NA	M	54	NO	NO	NO	NO	NO	NO
MOB-128	32.4	NA	NA	NA	NA	NA	NA	NA	F	49	NO	NO	NO	NO	NO	NO
MOY-129	9.8	65.7	217.3	303.9	261.3	272.7	NA	NA	F	19	NO	NO	NO	NO	NO	NO
MOY-130	16.8	NA	840.3	1153.7	992.4	564.5	167.4	43.1	F	54	NO	NO	NO	NO	NO	NO
MOY-131	5.7	2.8	37	67.4	81.3	NA	NA	NA	M	41	NO	NO	NO	NO	YES	NO
MOY-132	29.3	NA	NA	NA	NA	NA	NA	NA	M	30	NO	NO	NO	NO	NO	NO
MOY-133	4.6	NA	NA	NA	NA	NA	NA	NA	M	53	NO	NO	NO	NO	NO	NO
MOY-134	6.1	43.6	120.4	161.7	NA	NA	NA	NA	M	55	NO	YES	NO	NO	NO	NO
MOY-135	14.6	74	236.5	232.9	193.6	196.8	NA	NA	F	18	NO	NO	NO	NO	NO	NO
MOY-136	12.5	333.1	NA	393.7	NA	NA	NA	NA	M	27	NO	NO	NO	NO	YES	NO
MOY-137	0	1290.8	NA	NA	NA	NA	NA	NA	F	54	NO	YES	NO	NO	NO	NO
MOY-138	4.9	7.8	NA	77.8	NA	NA	NA	NA	M	44	NO	NO	NO	NO	YES	NO
MOY-139	5.1	44.7	518.4	1041.4	999	550.7	292	260.4	M	46	NO	NO	NO	NO	NO	YES
MOY-140	62.2	326.4	417.8	410.8	270.7	296.6	324.7	245.6	F	20	NO	NO	NO	NO	NO	NO
MOY-141	8.8	61.6	181.2	323.1	325.9	390.3	NA	NA	F	29	NO	NO	NO	NO	NO	NO
MOY-142	70.6	141.8	NA	223.9	NA	NA	NA	NA	M	28	NO	NO	NO	NO	YES	NO
MOY-143	61	4704.9	5281.6	NA	NA	NA	NA	NA	M	56	NO	NO	NO	NO	YES	YES
MOY-144	599.8	NA	NA	NA	NA	NA	NA	NA	M	59	NO	YES	NO	NO	NO	NO
MOY-145	31.3	32.4	37.5	38.2	34.2	32.1	NA	NA	M	32	NO	NO	NO	NO	YES	NO
MOY-146	2.8	191.5	557.6	1211.6	1321.5	2592.9	NA	NA	F	26	NO	NO	NO	NO	NO	NO
MOY-147	10.1	271.4	282.2	NA	NA	NA	NA	NA	F	32	NO	NO	NO	NO	NO	NO
MOY-148	7.9	NA	NA	NA	NA	NA	NA	NA	F	27	NO	NO	NO	NO	NO	NO
MOY-149	2.7	NA	1768	NA	NA	NA	NA	NA	M	52	NO	NO	NO	NO	NO	NO
MOY-150	8.7	335.9	3733.6	4080.8	NA	NA	NA	NA	F	56	NO	NO	NO	NO	NO	NO
MOY-151	6.9	126.8	NA	258.1	NA	NA	NA	NA	F	42	NO	NO	NO	NO	NO	NO
MOY-152	4.9	156.2	196.9	23.1	268.3	285.9	NA	NA	F	25	NO	NO	NO	NO	NO	NO
MOY-153	7.2	NA	NA	NA	NA	NA	NA	NA	F	22	NO	NO	NO	NO	NO	NO
MOY-154	138.8	320.3	258.7	239.3	110	76.6	NA	NA	M	35	NO	NO	NO	NO	NO	NO
MOY-155	NA	NA	NA	NA	NA	NA	NA	NA	M	56	NO	NO	NO	NO	NO	YES
MOY-156	NA	NA	NA	NA	NA	NA	NA	NA	M	60	NO	NO	NO	NO	NO	NO
MOY-157	3.5	14.8	NA	NA	NA	NA	NA	NA	F	18	NO	NO	NO	NO	NO	NO
MOY-158	5.1	1325.5	15179.5	NA	NA	NA	NA	NA	F	67	NO	NO	NO	NO	NO	NO
MOY-159	11.6	156.4	226.3	486.6	452.4	345	156.1	137.5	F	29	NO	NO	NO	NO	NO	NO
MOY-160	344.9	3394.8	3817.4	3911.9	NA	NA	NA	NA	F	48	NO	NO	NO	NO	NO	NO
MOY-161	NA	NA	NA	NA	NA	NA	NA	NA	F	67	NO	YES	NO	NO	NO	NO
MOB-162	4.8	NA	NA	NA	NA	NA	NA	NA	F	35	NO	NO	NO	NO	NO	NO
MOB-163	217.5	NA	NA	NA	NA	NA	NA	NA	M	26	NO	NO	NO	NO	NO	NO
MOB-164	4.9	NA	NA	NA	NA	NA	NA	NA	F	39	NO	NO	NO	NO	NO	NO
MOB-165	26.3	NA	NA	NA	NA	NA	NA	NA	F	32	NO	NO	NO	NO	NO	NO
MOB-166	NA	NA	NA	NA	NA	NA	NA	NA	M	40	NO	NO	NO	NO	YES	NO
MOB-167	NA	NA	NA	NA	NA	NA	NA	NA	F	79	NO	NO	NO	NO	NO	NO
MOY-168	7.3	259.7	NA	NA	NA	NA	NA	NA	F	27	NO	NO	NO	NO	NO	NO
MOY-169	242.2	8479.9	6464.5	5536.6	3485.5	2581.3	NA	NA	M	24	NO	NO	NO	NO	NO	NO
MOY-170	6	18.5	24.2	67.6	NA	NA	NA	NA	F	28	NO	NO	NO	NO	NO	NO
MOY-171	2.5	17.9	42.1	58.3	NA	NA	NA	NA	F	27	NO	NO	NO	NO	NO	NO
MOY-172	2.5	37.4	85.4	254.3	537.5	NA	NA	NA	F	25	NO	NO	NO	NO	NO	NO
MOY-173	3.7	51.7	4737	6844.9	3189.9	2384.5	NA	NA	F	67	NO	NO	NO	NO	NO	NO
MOY-174	NA	NA	NA	NA	NA	NA	NA	NA	M	87	NO	NO	NO	NO	NO	NO
MOY-175	7.5	1038.8	1251.1	1817.9	NA	NA	NA	NA	F	50	NO	NO	NO	NO	NO	NO
MOY-176	NA	NA	NA	NA	NA	NA	NA	NA	F	81	NO	NO	NO	NO	NO	NO
MOY-177	NA	NA	NA	NA	NA	NA	NA	NA	M	62	NO	YES	NO	NO	NO	NO
MOY-178	2.7	360.9	1034.1	1593.7	NA	NA	NA	NA	F	53	NO	NO	NO	NO	NO	NO
MOY-179	7.5	4.7	3878.3	7473.7	NA	NA	NA	NA	M	30	NO	NO	NO	NO	NO	NO
MOY-180	732.6	NA	NA	NA	NA	NA	NA	NA	F	68	NO	NO	NO	NO	NO	NO
MOY-181	7.6	20.4	1024.7	1515.3	649.3	NA	NA	NA	F	52	YES	YES	NO	NO	NO	NO
MOY-182	3.9	281.7	57	116.7	NA	NA	NA	NA	M	36	NO	NO	NO	NO	NO	NO
MOY-183	3.1	70.7	918.8	467.8	NA	120.1	NA	NA	M	22	NO	NO	NO	NO	NO	NO
MOY-184	NA	NA	NA	NA	NA	NA	NA	NA	F	77	YES	NO	YES	NO	NO	NO
MOY-185	NA	NA	NA	NA	NA	NA	NA	NA	F	57	NO	NO	NO	NO	NO	NO
MOY-186	NA	NA	NA	NA	NA	NA	NA	NA	F	77	NO	YES	NO	NO	NO	NO
MOY-187	NA	NA	NA	NA	NA	NA	NA	NA	F	65	NO	NO	NO	NO	NO	NO
MOY-188	3	66.5	NA	NA	NA	NA	NA	NA	F	33	NO	NO	NO	NO	NO	NO
MOY-189	111.3	NA	100.5	112.5	NA	NA	NA	NA	M	23	NO	NO	NO	NO	NO	NO
MOY-190	10.2	NA	4285.3	3493.8	NA	NA	NA	NA	M	33	NO	NO	NO	NO	NO	NO

## Sheet: Figs 4-5 Raw data
ID	D00	D07	D15	D30	Sex	Age	Obesity	Diabetes	Cardiovasculaire_Disease	Asthma	Smoking	Alcohol
MOB-001	0.71	1.12	0.85	1	F	62	NO	YES	YES	NO	NO	NO
MOB-002	0.53	0.7	1.13	0.99	F	62	NO	YES	YES	NO	NO	NO
MOB-003	0.85	0.49	0.76	0.37	F	30	NO	NO	NO	YES	NO	NO
MOB-004	0.89	1.37	1.11	0.53	M	24	YES	NO	NO	NO	NO	NO
MOB-005	0.86	1.55	1.16	1.46	M	52	NO	NO	NO	NO	NO	NO
MOB-006	1.11	0.72	2.24	0.43	M	37	NO	NO	NO	NO	YES	NO
MOY-007	0.77	0.53	0.92	0.48	F	26	NO	YES	NO	NO	NO	NO
MOY-008	0.95	0.88	0.98	0.63	F	24	NO	YES	NO	NO	NO	NO
MOY-009	1.78	1.97	1.43	1.42	M	18	NO	YES	NO	NO	NO	NO
MOY-010	1.02	1.63	0.64	0.39	F	58	NO	YES	NO	NO	NO	NO
MOY-011	3.19	2.87	2.68	NA	M	49	NO	YES	NO	NO	NO	NO
MOY-012	0.9	1.5	1.49	0.55	F	54	NO	YES	NO	NO	NO	NO
MOY-013	0.9	NA	NA	NA	F	69	NO	YES	NO	NO	NO	NO
MOY-014	1.64	NA	NA	NA	F	64	NO	YES	NO	NO	NO	NO
MOY-015	1.11	1.32	1.33	NA	F	34	NO	YES	NO	NO	NO	NO
MOY-016	3.11	NA	1.88	2.22	M	59	NO	YES	NO	NO	NO	NO
MOY-017	1.94	2.2	1.78	0.96	F	51	NO	YES	NO	NO	NO	NO
MOY-018	1.06	1.65	0.96	0.52	F	53	NO	YES	NO	NO	NO	NO
MOY-019	0.98	2.03	1.45	0.97	M	48	NO	YES	NO	NO	NO	NO
MOY-020	0.98	NA	NA	NA	M	71	NO	YES	NO	NO	NO	NO
MOY-021	0.9	NA	NA	NA	M	41	NO	YES	NO	NO	NO	NO
MOY-022	0.72	NA	1.87	0.75	M	60	NO	YES	NO	NO	NO	NO
MOY-023	0.76	1.29	1.67	0.65	M	43	NO	YES	NO	NO	NO	NO
MOY-024	1.2	2.57	2.86	2.12	M	59	NO	YES	NO	NO	NO	NO
MOY-025	0.79	2.84	2.76	1.56	M	63	NO	YES	NO	NO	NO	NO
MOY-026	0.72	0.75	1.04	0.36	F	19	NO	YES	NO	NO	NO	NO
MOY-027	0.75	NA	NA	NA	F	59	NO	YES	NO	NO	NO	NO
MOY-028	0.85	1.8	1.25	0.48	F	45	NO	YES	NO	NO	NO	NO
MOY-029	0.92	0.53	0.9	0.42	M	32	NO	YES	NO	NO	NO	NO
MOY-030	1.35	2.04	NA	1.49	F	65	NO	YES	NO	NO	NO	NO
MOY-031	1.19	NA	NA	NA	F	36	NO	YES	NO	NO	NO	NO
MOY-032	1.71	NA	2.44	2.39	F	72	NO	YES	NO	NO	NO	NO
MOY-033	1.08	1.22	1.01	0.44	F	35	NO	YES	NO	NO	NO	NO
MOY-034	0.75	NA	NA	NA	M	32	NO	YES	NO	NO	NO	NO
MOB-035	1.1	0.75	1.31	0.47	F	47	NO	NO	NO	NO	YES	NO
MOB-036	2.33	NA	NA	NA	M	47	NO	NO	NO	NO	YES	NO
MOB-037	0.99	1.5	NA	NA	F	42	NO	NO	NO	NO	YES	NO
MOB-038	1.18	0.69	NA	0.91	F	52	NO	NO	NO	NO	YES	NO
MOB-039	1.62	1.01	NA	1.02	M	53	NO	NO	NO	NO	YES	NO
MOY-040	0.62	0.76	0.77	0.51	M	61	NO	YES	NO	NO	NO	NO
MOY-041	3.17	0.84	NA	NA	F	60	NO	YES	NO	NO	NO	NO
MOY-042	1.14	3.12	3.09	2	F	59	NO	YES	NO	NO	NO	NO
MOY-043	1.06	0.78	NA	0.52	M	50	NO	YES	NO	NO	NO	NO
MOY-044	0.96	NA	NA	NA	F	41	NO	YES	NO	NO	NO	NO
MOY-045	0.9	1.79	1.62	0.39	F	24	NO	YES	NO	NO	NO	NO
MOY-046	0.98	NA	NA	NA	M	48	NO	YES	NO	NO	NO	NO
MOY-047	0.83	NA	1.15	0.47	F	25	NO	YES	NO	NO	NO	NO
MOY-048	2.9	2.24	NA	NA	M	52	NO	YES	NO	NO	NO	NO
MOB-049	0.97	2.79	3.05	2.54	M	67	NO	NO	NO	NO	YES	NO
MOB-050	0.43	0.76	0.74	0.87	F	63	NO	NO	NO	NO	YES	NO
MOY-051	0.89	1	NA	NA	F	43	NO	YES	NO	NO	NO	NO
MOY-052	1	2.39	NA	NA	F	48	NO	YES	NO	NO	NO	NO
MOY-053	1.5	2.42	NA	NA	F	74	NO	YES	NO	NO	NO	NO
MOY-054	1.61	2.49	NA	NA	M	81	NO	YES	NO	NO	NO	NO
MOY-055	0.9	NA	NA	NA	F	31	NO	YES	NO	NO	NO	NO
MOY-056	1.23	0.68	0.78	0.46	F	24	NO	YES	NO	NO	NO	NO
MOY-057	1.06	0.81	0.84	0.56	M	56	NO	YES	NO	NO	NO	NO
MOY-058	0.88	NA	NA	0.77	F	58	NO	YES	NO	NO	NO	NO
MOY-059	1.59	NA	1.4	0.99	F	53	NO	YES	NO	NO	NO	NO
MOY-060	1.3	NA	NA	NA	F	53	NO	YES	NO	NO	NO	NO
MOY-061	1.84	NA	NA	NA	M	24	NO	YES	NO	NO	NO	NO
MOY-062	0.73	0.82	0.73	0.55	M	32	NO	YES	NO	NO	NO	NO
MOB-063	1.54	0.7	0.9	0.48	M	26	NO	NO	NO	NO	YES	NO
MOB-064	1.21	0.73	0.96	0.46	F	59	NO	NO	NO	NO	YES	NO
MOB-065	1.02	0.68	0.88	0.51	M	25	NO	NO	NO	NO	YES	NO
MOY-066	NA	0.97	NA	NA	F	25	NO	YES	NO	NO	NO	NO
MOY-067	1.06	1.26	1.27	0.65	F	56	NO	YES	NO	NO	NO	NO
MOY-068	2.08	NA	NA	NA	F	74	NO	YES	NO	NO	NO	NO
MOY-069	1.37	1.99	2.25	NA	F	56	NO	YES	NO	NO	NO	NO
MOY-070	1.07	0.94	1.16	0.57	F	57	NO	YES	NO	NO	NO	NO
MOY-071	1.05	NA	NA	2.68	M	50	NO	YES	NO	NO	NO	NO
MOY-072	1.87	0.62	0.88	1.34	M	49	NO	YES	NO	NO	NO	NO
MOY-073	0.78	0.8	1.3	0.5	M	57	NO	YES	NO	NO	NO	NO
MOY-074	1.09	2.25	1.71	0.91	F	57	NO	YES	NO	NO	NO	NO
MOY-075	1.78	2.69	1.6	0.83	F	55	NO	YES	NO	NO	NO	NO
MOB-076	3.23	2.84	2.69	2.24	M	60	NO	NO	NO	NO	YES	NO
MOB-077	1.65	0.99	0.79	0.5	M	19	NO	NO	NO	NO	YES	NO
MOB-078	2.41	1.22	0.74	0.45	F	24	NO	NO	NO	NO	YES	NO
MOB-079	3.55	2.34	1.56	0.78	F	56	NO	NO	NO	NO	YES	NO
MOB-080	1.53	3.02	2.03	NA	F	55	NO	YES	NO	NO	NO	NO
MOY-081	0.71	1.44	1.25	0.69	M	29	NO	NO	NO	NO	YES	NO
MOY-082	2.56	2.07	1.22	0.8	M	60	NO	NO	NO	NO	NO	NO
MOY-083	1.49	1.82	1.39	1.15	M	47	NO	NO	NO	NO	NO	NO
MOY-084	1.25	NA	NA	NA	F	63	NO	NO	NO	NO	NO	NO
MOY-085	0.76	1.17	0.87	0.52	M	33	NO	NO	NO	NO	YES	NO
MOY-086	0.91	0.96	2.21	0.78	F	35	NO	NO	NO	NO	NO	NO
MOY-087	1.56	NA	NA	NA	F	49	NO	NO	NO	NO	NO	NO
MOY-088	0.92	NA	NA	NA	M	60	NO	NO	NO	NO	NO	NO
MOB-089	2.79	2.81	1.57	0.98	F	52	NO	YES	NO	NO	NO	NO
MOY-090	1.68	NA	NA	NA	F	22	NO	NO	NO	NO	NO	NO
MOY-091	1.77	NA	NA	NA	F	30	NO	NO	NO	NO	NO	NO
MOY-092	0.72	NA	NA	NA	F	30	NO	NO	NO	NO	NO	NO
MOY-093	2.91	NA	NA	NA	F	48	NO	NO	NO	NO	NO	NO
MOY-094	1.49	3.45	2.88	2.14	F	19	NO	NO	NO	NO	NO	NO
MOY-095	0.79	0.68	3.4	1.57	F	48	NO	NO	NO	NO	NO	NO
MOY-096	0.95	NA	NA	NA	M	46	NO	NO	NO	NO	NO	NO
MOY-097	0.93	NA	NA	NA	M	46	NO	NO	NO	NO	NO	NO
MOY-098	1.82	2.09	2.31	1.51	F	58	NO	NO	NO	NO	NO	NO
MOY-099	0.7	0.85	1.27	0.99	M	65	NO	NO	NO	NO	NO	NO
MOY-100	1.49	NA	1.51	0.78	F	42	NO	NO	NO	NO	NO	NO
MOY-101	1.43	NA	NA	NA	F	49	NO	NO	NO	NO	NO	NO
MOB-102	1.29	NA	0.78	0.57	F	44	NO	YES	NO	NO	NO	NO
MOB-103	0.8	NA	NA	NA	F	59	NO	YES	NO	NO	NO	NO
MOB-104	0.99	NA	NA	NA	F	25	NO	YES	NO	NO	NO	NO
MOB-105	1.06	NA	NA	NA	M	61	NO	YES	NO	NO	NO	NO
MOB-106	0.99	NA	NA	NA	F	25	NO	YES	NO	NO	NO	NO
MOY-107	0.9	0.82	1.74	0.77	F	25	NO	NO	NO	NO	NO	NO
MOY-108	1.08	0.81	1.67	0.9	M	19	NO	NO	NO	NO	NO	NO
MOY-109	1	1.33	1.18	0.79	F	30	NO	NO	NO	NO	NO	NO
MOY-110	0.44	0.63	0.66	0.68	M	53	NO	YES	NO	NO	NO	NO
MOB-111	1.34	NA	NA	NA	F	41	NO	YES	NO	NO	NO	NO
MOB-112	0.94	0.92	NA	NA	F	27	NO	YES	NO	NO	NO	NO
MOY-113	0.49	0.79	0.76	0.8	F	68	NO	NO	NO	NO	NO	NO
MOY-114	1.16	1.73	1.51	1.13	F	47	NO	NO	NO	NO	NO	NO
MOY-115	0.97	1.37	1.35	0.65	F	19	NO	NO	NO	NO	NO	NO
MOY-116	1.11	1.12	2.01	NA	F	58	NO	NO	NO	NO	NO	NO
MOB-117	0.94	1.07	1.04	NA	M	24	NO	YES	NO	NO	NO	NO
MOY-118	0.72	1.68	1.04	1.21	F	45	NO	NO	NO	NO	NO	NO
MOB-119	0.99	2.89	NA	2.34	F	36	NO	YES	NO	NO	NO	NO
MOB-120	0.91	1.09	NA	NA	F	42	NO	YES	NO	NO	NO	NO
MOY-121	0.84	NA	NA	NA	M	50	NO	NO	NO	NO	NO	NO
MOY-122	0.8	NA	NA	NA	F	65	NO	NO	NO	NO	NO	NO
MOY-123	0.65	NA	NA	NA	F	19	NO	NO	NO	NO	NO	NO
MOY-124	0.7	2.1	1.34	1.2	M	67	NO	NO	NO	NO	NO	NO
MOY-125	0.97	1.17	0.88	1.12	F	27	NO	NO	NO	NO	NO	NO
MOB-126	0.63	1.38	2.04	1.24	M	37	NO	YES	NO	NO	NO	NO
MOB-127	1.33	2.15	2.73	1.89	M	54	NO	YES	NO	NO	NO	NO
MOB-128	1.01	NA	NA	NA	F	49	NO	YES	NO	NO	NO	NO
MOY-129	1.6	2.89	2.71	2.11	F	19	NO	NO	NO	NO	NO	NO
MOY-130	0.71	NA	1.37	0.89	F	54	NO	NO	NO	NO	NO	NO
MOY-131	0.65	1.09	0.81	1.17	M	41	NO	NO	NO	NO	YES	NO
MOY-132	0.82	NA	NA	NA	M	30	NO	NO	NO	NO	YES	NO
MOY-133	0.58	NA	NA	NA	M	53	NO	NO	NO	NO	YES	NO
MOY-134	0.74	1.74	1.92	1.49	M	55	NO	YES	NO	NO	NO	NO
MOY-135	0.48	1.12	0.64	0.57	F	18	NO	NO	NO	NO	NO	NO
MOY-136	0.53	1.11	NA	0.74	M	27	NO	NO	NO	NO	YES	NO
MOY-137	0.98	3.17	NA	NA	F	54	NO	NO	NO	NO	YES	NO
MOY-138	0.92	1.23	NA	0.76	M	44	NO	NO	NO	NO	YES	NO
MOY-139	0.72	1.29	1.59	0.7	M	46	NO	NO	NO	NO	NO	YES
MOY-140	0.91	2.33	1.24	0.71	F	20	NO	NO	NO	NO	NO	NO
MOY-141	0.49	0.86	0.83	0.47	F	29	NO	NO	NO	NO	NO	NO
MOY-142	0.66	1.01	NA	1.4	M	28	NO	NO	NO	NO	YES	NO
MOY-143	2.57	3.14	2.95	NA	M	56	NO	NO	NO	NO	YES	YES
MOY-144	0.66	NA	NA	NA	M	59	NO	NO	NO	NO	YES	YES
MOY-145	1.02	1.32	1.01	1.73	M	32	NO	NO	NO	NO	YES	NO
MOY-146	0.64	1.4	0.62	1.04	F	26	NO	NO	NO	NO	NO	NO
MOY-147	0.86	3.26	1.73	NA	F	32	NO	NO	NO	NO	NO	NO
MOY-148	1.11	NA	NA	NA	F	27	NO	NO	NO	NO	NO	NO
MOY-149	0.67	NA	2.01	NA	M	52	NO	NO	NO	NO	NO	NO
MOY-150	1.22	3.34	2.94	1.92	F	56	NO	NO	NO	NO	NO	NO
MOY-151	0.73	3.46	NA	0.84	F	42	NO	NO	NO	NO	NO	NO
MOY-152	0.6	1.23	0.9	0.66	F	25	NO	NO	NO	NO	NO	NO
MOY-153	0.74	NA	NA	NA	F	22	NO	NO	NO	NO	NO	NO
MOY-154	0.53	0.97	0.62	0.71	M	35	NO	NO	NO	NO	NO	NO
MOY-155	0.58	2.53	1.9	0.98	M	56	NO	NO	NO	NO	NO	YES
MOY-156	0.69	0.89	1.05	0.89	M	60	NO	NO	NO	NO	NO	NO
MOY-157	0.85	1.08	NA	NA	F	18	NO	NO	NO	NO	NO	NO
MOY-158	0.61	2.99	2.09	NA	F	67	NO	NO	NO	NO	NO	NO
MOY-159	0.78	1.58	0.92	0.68	F	29	NO	NO	NO	NO	NO	NO
MOY-160	0.66	2.21	0.97	0.87	F	48	NO	NO	NO	NO	NO	NO
MOY-161	0.64	1.06	1.84	1.01	F	67	NO	NO	NO	NO	NO	NO
MOB-162	0.94	NA	NA	NA	F	35	NO	YES	NO	NO	NO	NO
MOB-163	0.94	NA	NA	NA	M	26	NO	YES	NO	NO	NO	NO
MOB-164	0.62	NA	NA	NA	F	39	NO	YES	NO	NO	NO	NO
MOB-165	0.79	NA	NA	NA	F	32	NO	YES	NO	NO	NO	NO
MOB-166	0.64	0.81	0.69	0.71	M	40	NO	YES	NO	NO	NO	NO
MOB-167	1.08	1.25	1.53	1.18	F	79	NO	YES	NO	NO	NO	NO
MOY-168	0.87	2	NA	NA	F	27	NO	NO	NO	NO	NO	NO
MOY-169	0.56	1.6	1.17	0.77	M	24	NO	NO	NO	NO	NO	NO
MOY-170	0.49	0.93	0.65	0.77	F	28	NO	NO	NO	NO	NO	NO
MOY-171	0.51	0.94	0.75	0.6	F	27	NO	NO	NO	NO	NO	NO
MOY-172	0.49	1.03	0.75	0.81	F	25	NO	NO	NO	NO	NO	NO
MOY-173	0.62	2.12	2.78	1.61	F	67	NO	NO	NO	NO	NO	NO
MOY-174	0.56	0.72	0.93	0.74	M	87	NO	NO	NO	NO	NO	NO
MOY-175	0.83	1.96	1.61	0.75	F	50	NO	NO	NO	NO	NO	NO
MOY-176	0.56	1.32	2.59	1.19	F	81	NO	NO	NO	NO	NO	NO
MOY-177	0.47	2.93	2.68	1.43	M	62	NO	NO	NO	NO	NO	NO
MOY-178	0.47	2.15	2.18	1.29	F	53	NO	NO	NO	NO	NO	NO
MOY-179	0.61	0.93	3.09	1.53	M	30	NO	NO	NO	NO	NO	NO
MOY-180	0.44	NA	NA	NA	F	68	NO	NO	NO	NO	NO	NO
MOY-181	0.61	0.87	1.28	1.1	F	52	NO	NO	NO	NO	NO	NO
MOY-182	0.45	1.07	0.67	1.2	M	36	NO	NO	NO	NO	NO	NO
MOY-183	0.44	1	0.9	0.77	M	22	NO	NO	NO	NO	NO	NO
MOY-184	0.69	0.94	1.07	1.17	F	77	YES	NO	YES	NO	NO	NO
MOY-185	0.6	1.62	1.84	1.06	F	57	YES	NO	YES	NO	NO	NO
MOY-186	0.74	1.2	0.89	0.93	F	77	YES	NO	YES	NO	NO	NO
MOY-187	0.45	2.3	2.1	NA	F	65	YES	NO	YES	NO	NO	NO
MOY-188	0.44	1.04	NA	NA	F	33	YES	NO	YES	NO	NO	NO
MOY-189	0.53	NA	0.78	1.07	M	23	NO	NO	NO	NO	NO	NO
MOY-190	0.66	NA	2.94	1.52	M	33	NO	NO	NO	NO	NO	NO

## Sheet: Figs 2,3,10 raw data
ID	D00	D07	D15	D30	Vaccinated	Sex	Age	Obesity	Diabetes	Cardiovasculaire_Disease	Asthma	Smoking	Alcohol
MOB-001	0.19	0.58	0.33	0.21	YES	F	62	NO	YES	YES	NO	NO	NO
MOB-002	0.22	0.19	0.32	0.03	YES	F	62	NO	YES	YES	NO	NO	NO
MOB-003	0.63	1.25	0.94	0.32	NO	F	30	NO	NO	NO	YES	NO	NO
MOB-004	0.75	2.09	1.5	1	NO	M	24	YES	NO	NO	NO	NO	NO
MOB-005	0.25	0.57	0.44	0.96	NO	M	52	NO	NO	NO	NO	NO	NO
MOB-006	0.23	0.68	2.2	0.2	NO	M	37	NO	NO	NO	NO	YES	NO
MOY-007	0.31	0.23	2.79	0.98	NO	F	26	NO	NO	NO	NO	NO	NO
MOY-008	0.22	0.56	0.34	0.12	NO	F	24	NO	NO	NO	YES	NO	NO
MOY-009	0.33	1.87	1.38	0.33	NO	M	18	NO	NO	NO	NO	NO	NO
MOY-010	0.46	1.89	0.18	0.2	NO	F	58	NO	NO	NO	NO	NO	NO
MOY-011	3.52	2.7	2.3	NA	NO	M	49	NO	YES	NO	NO	NO	NO
MOY-012	0.47	0.52	1.1	0.38	NO	F	54	NO	NO	NO	NO	NO	NO
MOY-013	0.2	NA	NA	NA	NO	F	69	NO	NO	NO	NO	NO	NO
MOY-014	0.35	NA	NA	NA	NO	F	64	NO	NO	NO	NO	NO	NO
MOY-015	0.22	0.33	2.2	NA	NO	F	34	NO	NO	NO	NO	NO	NO
MOY-016	2.43	NA	1.55	0.48	NO	M	59	NO	NO	NO	NO	NO	NO
MOY-017	0.2	2.29	2.2	0.8	NO	F	51	NO	YES	NO	NO	NO	NO
MOY-018	0.42	1.31	1.04	0.8	NO	F	53	NO	YES	NO	NO	NO	NO
MOY-019	0.17	0.71	0.48	0.27	NO	M	48	NO	NO	NO	NO	NO	NO
MOY-020	0.32	NA	NA	NA	NO	M	71	NO	YES	NO	NO	NO	NO
MOY-021	0.25	NA	NA	NA	NO	M	41	NO	NO	NO	NO	NO	NO
MOY-022	0.16	NA	0.51	1	NO	M	60	NO	NO	NO	NO	NO	NO
MOY-023	0.24	0.31	0.44	0.12	NO	M	43	NO	NO	NO	NO	NO	NO
MOY-024	0.21	1.96	3.5	2.48	NO	M	59	NO	NO	NO	NO	NO	NO
MOY-025	0.38	2.89	3.84	2.2	YES	M	63	NO	NO	NO	NO	NO	NO
MOY-026	0.36	0.45	0.45	0.16	NO	F	19	NO	NO	NO	NO	NO	NO
MOY-027	0.17	NA	NA	NA	NO	F	59	NO	NO	NO	NO	NO	NO
MOY-028	0.37	2.84	1.94	0.65	NO	F	45	NO	NO	NO	NO	NO	NO
MOY-029	1.78	1.45	1.57	0.45	NO	M	32	NO	NO	NO	NO	NO	NO
MOY-030	0.06	0.19	NA	0.33	NO	F	65	NO	NO	NO	NO	NO	NO
MOY-031	0.37	NA	NA	NA	NO	F	36	NO	YES	NO	NO	NO	NO
MOY-032	0.51	NA	0	0.08	YES	F	72	NO	NO	NO	NO	NO	NO
MOY-033	0.69	1.63	2.08	0.33	NO	F	35	NO	NO	NO	NO	NO	NO
MOY-034	0.34	NA	NA	NA	NO	M	32	NO	NO	NO	NO	NO	NO
MOB-035	0.23	0.28	0.07	0.04	NO	F	47	NO	NO	NO	YES	YES	NO
MOB-036	0.46	NA	NA	NA	NO	M	47	NO	NO	NO	NO	YES	NO
MOB-037	0.32	3.6	NA	NA	NO	F	42	NO	NO	NO	NO	YES	NO
MOB-038	0.1	0.26	NA	0.08	NO	F	52	NO	NO	NO	NO	YES	NO
MOB-039	1.36	2.09	NA	0.66	NO	M	53	NO	NO	NO	NO	YES	NO
MOY-040	0.16	0.32	0.25	0.11	NO	M	61	NO	NO	NO	NO	NO	NO
MOY-041	1.63	3.6	NA	NA	NO	F	60	NO	NO	NO	NO	NO	NO
MOY-042	0.17	0.79	1.03	0.64	NO	F	59	NO	NO	NO	NO	NO	NO
MOY-043	1.13	0.62	NA	0.22	NO	M	50	NO	NO	NO	NO	NO	NO
MOY-044	0.31	NA	NA	NA	NO	F	41	NO	NO	NO	NO	NO	NO
MOY-045	0.45	1.55	2.11	1.78	NO	F	24	NO	NO	NO	NO	NO	NO
MOY-046	0.33	NA	NA	NA	NO	M	48	NO	NO	NO	NO	NO	NO
MOY-047	0.2	NA	0.32	0.23	NO	F	25	NO	NO	NO	NO	NO	NO
MOY-048	3.53	3.22	NA	NA	NO	M	52	NO	NO	NO	NO	NO	NO
MOB-049	0.37	0.63	0.33	0.18	YES	M	67	NO	NO	YES	NO	YES	NO
MOB-050	0.21	0.75	0.21	0.11	YES	F	63	NO	NO	NO	NO	YES	NO
MOY-051	1.11	1.5	NA	NA	NO	F	43	NO	NO	NO	NO	NO	NO
MOY-052	0.34	0.76	NA	NA	NO	F	48	NO	NO	NO	YES	NO	NO
MOY-053	0.23	0.81	NA	NA	NO	F	74	NO	YES	NO	NO	NO	NO
MOY-054	0.38	0.44	NA	NA	NO	M	81	NO	NO	NO	NO	NO	NO
MOY-055	0.27	NA	NA	NA	NO	F	31	NO	NO	NO	NO	NO	NO
MOY-056	0.4	0.97	0.55	0.38	NO	F	24	NO	NO	NO	NO	NO	NO
MOY-057	0.16	0.61	0.36	0.29	NO	M	56	NO	NO	NO	NO	NO	NO
MOY-058	0.45	NA	NA	0.89	NO	F	58	NO	YES	NO	NO	NO	NO
MOY-059	1.97	NA	0	0.34	NO	F	53	NO	NO	NO	NO	NO	NO
MOY-060	0.38	NA	NA	NA	NO	F	53	NO	NO	NO	NO	NO	NO
MOY-061	0.25	NA	NA	NA	NO	M	24	NO	NO	NO	NO	NO	NO
MOY-062	0.73	1.94	2.64	0.21	NO	M	32	NO	NO	NO	NO	NO	NO
MOB-063	0.55	0.47	0.28	0.2	NO	M	26	NO	NO	NO	NO	YES	NO
MOB-064	0.15	0.65	0.38	0.32	NO	F	59	NO	NO	NO	NO	YES	NO
MOB-065	0.23	0.33	0.61	0.3	NO	M	25	NO	NO	NO	NO	YES	NO
MOY-066	NA	0.11	NA	NA	NO	F	25	NO	NO	NO	NO	NO	NO
MOY-067	0.31	0.42	0.16	0.31	NO	F	56	NO	NO	NO	YES	NO	NO
MOY-068	0.17	NA	NA	NA	NO	F	74	YES	YES	NO	NO	NO	NO
MOY-069	0.03	0.09	0.5	NA	NO	F	56	NO	NO	NO	NO	NO	NO
MOY-070	0.3	0.32	0.75	0.27	NO	F	57	NO	NO	NO	NO	NO	NO
MOY-071	0.37	NA	NA	NA	NO	M	50	NO	NO	NO	NO	NO	NO
MOY-072	0.23	0.27	0.14	0.11	NO	M	49	NO	NO	NO	NO	NO	NO
MOY-073	0.23	0.27	1.84	0.28	NO	M	57	NO	NO	NO	NO	NO	NO
MOY-074	0.48	2.7	2.99	1.7	NO	F	57	NO	NO	NO	NO	NO	NO
MOY-075	0.31	1.91	0.33	0.18	NO	F	55	NO	YES	NO	NO	NO	NO
MOB-076	3.28	2.34	1.73	0.61	YES	M	60	NO	NO	NO	NO	YES	NO
MOB-077	0.48	0.52	0.31	0.19	NO	M	19	NO	NO	NO	NO	YES	NO
MOB-078	0.68	0.71	0.61	0.11	NO	F	24	NO	NO	NO	NO	YES	NO
MOB-079	2.93	2.2	0.83	0.54	NO	F	56	NO	YES	NO	NO	YES	NO
MOB-080	0.14	2.26	0.67	NA	NO	F	55	NO	YES	NO	NO	NO	NO
MOY-081	0.15	1.6	0.74	0.27	NO	M	29	NO	NO	NO	NO	YES	NO
MOY-082	0.65	1.12	0.86	0.56	NO	M	60	NO	NO	NO	NO	NO	NO
MOY-083	0.63	0.96	0.61	0.17	NO	M	47	NO	NO	NO	NO	NO	NO
MOY-084	0.3	NA	NA	NA	NO	F	63	NO	NO	NO	NO	NO	NO
MOY-085	0.14	0.35	0.3	0.38	NO	M	33	NO	NO	NO	NO	YES	NO
MOY-086	0.71	1.29	3.78	1.55	NO	F	35	NO	NO	NO	NO	NO	NO
MOY-087	0.32	NA	NA	NA	NO	F	49	NO	YES	NO	NO	NO	NO
MOY-088	0.77	NA	NA	NA	NO	M	60	NO	NO	NO	NO	NO	NO
MOB-089	2.42	1.65	1.16	0.72	NO	F	52	NO	NO	NO	NO	NO	NO
MOY-090	0.27	NA	NA	NA	NO	F	22	NO	NO	NO	NO	NO	NO
MOY-091	0.23	NA	NA	NA	NO	F	30	NO	NO	NO	NO	NO	NO
MOY-092	0.56	NA	NA	NA	NO	F	30	NO	NO	NO	YES	NO	NO
MOY-093	1.76	NA	NA	NA	NO	F	48	NO	NO	NO	NO	NO	NO
MOY-094	0.37	1.03	0.52	0.34	NO	F	19	NO	NO	NO	NO	NO	NO
MOY-095	0.28	0.25	0.8	0.68	YES	F	48	NO	NO	NO	NO	NO	NO
MOY-096	0.17	NA	NA	NA	NO	M	46	NO	NO	NO	NO	NO	NO
MOY-097	0.19	NA	NA	NA	NO	M	46	NO	NO	NO	YES	NO	NO
MOY-098	0.26	0.22	0.23	0.12	NO	F	58	NO	NO	NO	NO	NO	NO
MOY-099	0.23	0.44	0.3	0.43	YES	M	65	NO	NO	YES	NO	NO	NO
MOY-100	0.12	NA	2.64	1.12	NO	F	42	NO	NO	NO	NO	NO	NO
MOY-101	0.16	NA	NA	NA	NO	F	49	NO	NO	NO	NO	NO	NO
MOB-102	0.18	NA	2.76	0.25	NO	F	44	NO	NO	NO	NO	NO	NO
MOB-103	0.16	NA	NA	NA	NO	F	59	NO	NO	NO	NO	NO	NO
MOB-104	0.28	NA	NA	NA	NO	F	25	NO	NO	NO	NO	NO	NO
MOB-105	0.2	NA	NA	NA	NO	M	61	NO	NO	NO	NO	NO	NO
MOB-106	3.97	NA	NA	NA	NO	F	25	NO	NO	NO	NO	NO	NO
MOY-107	0.21	0.35	1.27	0.4	NO	F	25	NO	NO	NO	NO	NO	NO
MOY-108	0.04	0.11	0.55	0.19	NO	M	19	NO	NO	NO	NO	NO	NO
MOY-109	0.15	0.41	0.14	0.18	NO	F	30	NO	NO	NO	NO	NO	NO
MOY-110	0.03	0.45	0.34	0.16	YES	M	53	NO	YES	NO	NO	NO	NO
MOB-111	0.54	NA	NA	NA	NO	F	41	NO	NO	NO	NO	NO	NO
MOB-112	0.39	0.25	NA	NA	NO	F	27	NO	NO	NO	NO	NO	NO
MOY-113	0.08	0.86	2.3	0.92	YES	F	68	NO	NO	NO	YES	NO	NO
MOY-114	0.42	1.91	1.04	1.1	NO	F	47	NO	NO	NO	NO	NO	NO
MOY-115	0.86	0.4	3.17	0.52	NO	F	19	NO	NO	NO	NO	NO	NO
MOY-116	0.63	0.47	2.89	NA	NO	F	58	NO	NO	NO	NO	NO	NO
MOB-117	0.27	0.2	0.25	NA	NO	M	24	NO	NO	NO	NO	NO	NO
MOY-118	0.38	0.73	0.67	0.5	NO	F	45	NO	NO	NO	NO	NO	NO
MOB-119	0.41	3.9	NA	1.76	NO	F	36	NO	NO	NO	NO	NO	NO
MOB-120	0.46	0.76	NA	NA	NO	F	42	NO	NO	NO	NO	NO	NO
MOY-121	0.19	NA	NA	NA	NO	M	50	NO	NO	NO	NO	NO	NO
MOY-122	0.23	NA	NA	NA	NO	F	65	NO	NO	NO	NO	NO	NO
MOY-123	0.17	NA	NA	NA	NO	F	19	NO	NO	NO	NO	NO	NO
MOY-124	0.14	1.52	2.08	1.59	NO	M	67	NO	NO	NO	NO	NO	NO
MOY-125	0.19	0.33	0.29	0.3	NO	F	27	NO	NO	NO	NO	NO	NO
MOB-126	0.32	1.76	2.7	2.7	NO	M	37	NO	NO	NO	NO	NO	NO
MOB-127	0.02	1.04	0.84	0	NO	M	54	NO	NO	NO	NO	NO	NO
MOB-128	0.32	NA	NA	NA	NO	F	49	NO	NO	NO	NO	NO	NO
MOY-129	0.07	0.63	0.58	0.49	NO	F	19	NO	NO	NO	NO	NO	NO
MOY-130	0.17	NA	1.44	0.66	NO	F	54	NO	NO	NO	NO	NO	NO
MOY-131	0.11	0.1	0.18	0.57	NO	M	41	NO	NO	NO	NO	YES	NO
MOY-132	0.47	NA	NA	NA	NO	M	30	NO	NO	NO	NO	YES	NO
MOY-133	0.33	NA	NA	NA	NO	M	53	NO	NO	NO	NO	YES	NO
MOY-134	0.04	0.69	0.55	0.37	NO	M	55	NO	YES	NO	NO	NO	NO
MOY-135	0.08	0.42	0.18	0.2	NO	F	18	NO	NO	NO	NO	NO	NO
MOY-136	1.65	0.33	NA	0.34	NO	M	27	NO	NO	NO	NO	YES	NO
MOY-137	0.24	3.12	NA	NA	NO	F	54	NO	YES	NO	NO	YES	NO
MOY-138	0.02	0.19	NA	0.14	NO	M	44	NO	NO	NO	NO	YES	NO
MOY-139	1.59	0.62	1.02	0.64	NO	M	46	NO	NO	NO	NO	NO	YES
MOY-140	1.11	2.58	2.13	1.52	NO	F	20	NO	NO	NO	NO	NO	NO
MOY-141	0.46	0.4	0.3	0.33	NO	F	29	NO	NO	NO	NO	NO	NO
MOY-142	0.28	0.29	NA	0.37	NO	M	28	NO	NO	NO	NO	YES	NO
MOY-143	4.65	2.8	0.75	NA	NO	M	56	NO	NO	NO	NO	YES	YES
MOY-144	0.08	NA	NA	NA	NO	M	59	NO	YES	NO	NO	YES	YES
MOY-145	0.36	0.3	0.47	0.61	NO	M	32	NO	NO	NO	NO	YES	NO
MOY-146	0.55	0.93	0.93	0.77	NO	F	26	NO	NO	NO	NO	NO	NO
MOY-147	0.23	1.88	1.14	NA	NO	F	32	NO	NO	NO	NO	NO	NO
MOY-148	0.34	NA	NA	NA	NO	F	27	NO	NO	NO	NO	NO	NO
MOY-149	0.33	NA	0.62	NA	NO	M	52	NO	NO	NO	NO	NO	NO
MOY-150	0.23	0.19	0.71	0.35	NO	F	56	NO	NO	NO	NO	NO	NO
MOY-151	1.36	1.51	NA	1.91	NO	F	42	NO	NO	NO	NO	NO	NO
MOY-152	0.61	0.64	0.46	0.77	NO	F	25	NO	NO	NO	NO	NO	NO
MOY-153	1.34	NA	NA	NA	NO	F	22	NO	NO	NO	NO	NO	NO
MOY-154	2.3	0.3	0.22	0.29	NO	M	35	NO	NO	NO	NO	NO	NO
MOY-155	0.05	1	0.61	0.31	YES	M	56	NO	NO	NO	NO	NO	YES
MOY-156	0.1	0.37	0.24	0.15	YES	M	60	NO	NO	NO	NO	NO	NO
MOY-157	0.17	0.19	NA	NA	NO	F	18	NO	NO	NO	NO	NO	NO
MOY-158	0.14	1.1	0.76	NA	NO	F	67	NO	NO	NO	NO	NO	NO
MOY-159	0.34	0.88	0.7	0.74	NO	F	29	NO	NO	NO	NO	NO	NO
MOY-160	0.34	1.5	0.76	0.26	NO	F	48	NO	NO	NO	NO	NO	NO
MOY-161	0.23	0.25	0.72	0.57	YES	F	67	NO	YES	NO	NO	NO	NO
MOB-162	0.28	NA	NA	NA	NO	F	35	NO	NO	NO	NO	NO	NO
MOB-163	0.48	NA	NA	NA	NO	M	26	NO	NO	NO	NO	NO	NO
MOB-164	0.53	NA	NA	NA	NO	F	39	NO	NO	NO	NO	NO	NO
MOB-165	0.32	NA	NA	NA	NO	F	32	NO	NO	NO	NO	NO	NO
MOB-166	0.31	0.26	0.32	0.36	YES	M	40	NO	NO	NO	NO	NO	NO
MOB-167	0.36	0.38	0.49	0.48	YES	F	79	NO	NO	NO	NO	NO	NO
MOY-168	0.29	0.74	NA	NA	NO	F	27	NO	NO	NO	NO	NO	NO
MOY-169	0.13	0.18	0.32	0.14	NO	M	24	NO	NO	NO	NO	NO	NO
MOY-170	0.13	0.2	0.31	0.13	NO	F	28	NO	NO	NO	NO	NO	NO
MOY-171	0.13	0.31	0.17	0.27	NO	F	27	NO	NO	NO	NO	NO	NO
MOY-172	0.15	0.26	0.35	0.42	NO	F	25	NO	NO	NO	NO	NO	NO
MOY-173	0.1	0.97	2.8	2.24	NO	F	67	NO	NO	NO	NO	NO	NO
MOY-174	0.38	0.48	0.31	0.43	YES	M	87	NO	NO	NO	NO	NO	NO
MOY-175	0.29	0.57	0.7	0.32	NO	F	50	NO	NO	NO	NO	NO	NO
MOY-176	0.18	0.21	0.53	0.38	YES	F	81	NO	NO	NO	NO	NO	NO
MOY-177	0.09	0.26	0.25	0.38	YES	M	62	NO	YES	NO	NO	NO	NO
MOY-178	0.28	1.05	1.7	1.15	NO	F	53	NO	NO	NO	NO	NO	NO
MOY-179	0.2	0.35	4.3	3.68	NO	M	30	NO	NO	NO	NO	NO	NO
MOY-180	0.27	NA	NA	NA	NO	F	68	NO	NO	NO	NO	NO	NO
MOY-181	0.17	0.3	3.04	1.11	NO	F	52	YES	YES	NO	NO	NO	NO
MOY-182	0.24	0.48	0.57	0.6	NO	M	36	NO	NO	NO	NO	NO	NO
MOY-183	0.1	0.33	0.57	0.45	NO	M	22	NO	NO	NO	NO	NO	NO
MOY-184	0.36	0.4	0.29	0.25	YES	F	77	YES	NO	YES	NO	NO	NO
MOY-185	0.18	0.31	0.29	0.21	YES	F	57	NO	NO	NO	NO	NO	NO
MOY-186	1.6	1.58	1.23	0.66	YES	F	77	NO	YES	NO	NO	NO	NO
MOY-187	0.39	0.41	0.66	NA	YES	F	65	NO	NO	NO	NO	NO	NO
MOY-188	0.21	0.22	NA	NA	NO	F	33	NO	NO	NO	NO	NO	NO
MOY-189	0.2	NA	2.25	0.14	NO	M	23	NO	NO	NO	NO	NO	NO
MOY-190	0.11	NA	2.3	1.11	NO	M	33	NO	NO	NO	NO	NO	NO
